# Supplementary material for: Predicting or Pretending: Artificial Intelligence for Protein-Ligand Interactions Lack of Sufficiently Large and Unbiased Datasets
Source: PubMed Central journal article supplement (PMC7052818; doi:10.3389/fphar.2020.00069), 2020-02-25
Supplement: DataSheet_1.pdf [file DataSheet_1.pdf]

**Supplementary Table 1.** Performance of ACNN models on the test subsets of the PDBbind (five random seeds). The averaged Pearson  $R^2$  values and standard errors are reported.

| Splitting method | Binding component | Core                       | Refined                    | General                    |
|------------------|-------------------|----------------------------|----------------------------|----------------------------|
| Random           | Complex           | 0.04 ( $\pm 0.05$ )        | 0.80 ( $\pm 0.00$ )        | 0.70 ( $\pm 0.02$ )        |
|                  | Ligand alone      | <b>0.09</b> ( $\pm 0.08$ ) | 0.71 ( $\pm 0.06$ )        | 0.60 ( $\pm 0.08$ )        |
|                  | Protein alone     | 0.08 ( $\pm 0.12$ )        | <b>0.84</b> ( $\pm 0.02$ ) | <b>0.73</b> ( $\pm 0.03$ ) |
| Scaffold         | Complex           | 0.14 ( $\pm 0.12$ )        | 0.60 ( $\pm 0.04$ )        | 0.61 ( $\pm 0.03$ )        |
|                  | Ligand alone      | 0.16 ( $\pm 0.20$ )        | 0.48 ( $\pm 0.09$ )        | 0.42 ( $\pm 0.07$ )        |
|                  | Protein alone     | <b>0.29</b> ( $\pm 0.08$ ) | <b>0.79</b> ( $\pm 0.03$ ) | <b>0.69</b> ( $\pm 0.02$ ) |
| Sequence         | complex           | 0.08 ( $\pm 0.13$ )        | 0.54 ( $\pm 0.06$ )        | 0.47 ( $\pm 0.04$ )        |
|                  | Ligand alone      | 0.13 ( $\pm 0.15$ )        | 0.35 ( $\pm 0.07$ )        | 0.23 ( $\pm 0.04$ )        |
|                  | Protein alone     | <b>0.16</b> ( $\pm 0.09$ ) | <b>0.63</b> ( $\pm 0.05$ ) | <b>0.54</b> ( $\pm 0.02$ ) |

**Supplementary Table 2.** Performance of ACNN model on PDBbind core set (five random seeds). The averaged Pearson  $R^2$  values and standard errors are reported.

| Splitting method | Binding component | Training set (refined)     | Training set (general)     |
|------------------|-------------------|----------------------------|----------------------------|
| Random           | Complex           | 0.70 ( $\pm 0.03$ )        | 0.73 ( $\pm 0.04$ )        |
|                  | Ligand alone      | <b>0.73</b> ( $\pm 0.03$ ) | <b>0.79</b> ( $\pm 0.02$ ) |
|                  | Protein alone     | 0.70 ( $\pm 0.03$ )        | 0.76 ( $\pm 0.01$ )        |
| Scaffold         | Complex           | 0.69 ( $\pm 0.02$ )        | <b>0.76</b> ( $\pm 0.03$ ) |
|                  | Ligand alone      | <b>0.77</b> ( $\pm 0.02$ ) | 0.76 ( $\pm 0.01$ )        |
|                  | Protein alone     | 0.67 ( $\pm 0.02$ )        | 0.69 ( $\pm 0.04$ )        |
| Sequence         | Complex           | 0.64 ( $\pm 0.05$ )        | 0.71 ( $\pm 0.03$ )        |
|                  | Ligand alone      | <b>0.75</b> ( $\pm 0.03$ ) | <b>0.73</b> ( $\pm 0.02$ ) |
|                  | Protein alone     | 0.63 ( $\pm 0.05$ )        | 0.73 ( $\pm 0.02$ )        |

**Supplementary Table 3.** Performance of ACNN model on a kinase inhibitor dataset. The averaged EF<sub>20</sub>, PI values and standard errors are reported.

| Inhibitor (HET ID)  | Physics-based approach <sup>a</sup> |                 | ACNN <sup>b</sup>   |                     |
|---------------------|-------------------------------------|-----------------|---------------------|---------------------|
|                     | EF <sub>20</sub> <sup>c</sup>       | PI <sup>d</sup> | EF <sub>20</sub>    | PI                  |
| VX-745 (52P)        | <b>5.00</b>                         | 0.60            | 0.00 (±0.00)        | -0.10 (±0.18)       |
| Gefitinib (IRE)     | 5.00                                | 0.57            | 0.51 (±1.13)        | -0.07 (±0.11)       |
| BI-2536 (R78)       | 5.00                                | 0.38            | 2.03 (±1.13)        | 0.13 (±0.14)        |
| LY-333531 (LY4)     | 5.00                                | 0.35            | 2.01 (±2.76)        | 0.08 (±0.13)        |
| CP-690550 (MI1)     | 3.80                                | 0.59            | 1.28 (±0.90)        | 0.19 (±0.19)        |
| Erlotinib (AQ4)     | 3.04                                | 0.44            | 1.42 (±0.91)        | -0.08 (±0.08)       |
| Dasatinib (1N1)     | 2.75                                | <b>0.64</b>     | 0.97 (±0.44)        | 0.10 (±0.09)        |
| Vandetanib (ZD6)    | 2.32                                | 0.25            | 0.84 (±0.39)        | 0.03 (±0.07)        |
| A-674563 (SS3)      | 2.27                                | 0.45            | <b>2.61</b> (±0.51) | <b>0.37</b> (±0.04) |
| Flavopiridol (CPB)  | 1.70                                | 0.07            | 1.70 (±1.20)        | 0.15 (±0.11)        |
| VX-680 (VX6)        | 1.69                                | 0.29            | 1.01 (±0.47)        | -0.01 (±0.07)       |
| Sunitinib (B49)     | 1.68                                | 0.04            | 1.31 (±0.37)        | 0.07 (±0.09)        |
| TAE-684 (GUI)       | 1.61                                | 0.13            | 0.84 (±0.06)        | -0.08 (±0.09)       |
| Staurosporine (STU) | 1.32                                | 0.29            | 1.22 (±0.14)        | 0.03 (±0.10)        |
| Crizotinib (VGH)    | 1.28                                | 0.31            | 0.00 (±0.00)        | -0.19 (±0.09)       |
| SB-203580 (SB2)     | 1.25                                | 0.15            | 0.75 (±1.12)        | -0.21 (±0.18)       |
| R406 (585)          | 1.21                                | 0.30            | 0.61 (±0.15)        | -0.22 (±0.06)       |
| Mean                | 2.70                                | 0.34            | 1.12 (±1.09)        | 0.01 (±0.18)        |

<sup>a</sup> Results from (Wan et al., 2013). <sup>b</sup> ACNN models (binding complex) trained on PDBbind refined set (with removal of structures overlapping with core set). <sup>c</sup> Number of predicted targets in top 20% denotes the number of true positives in top 20% of ranked kinase targets, which corresponds to the enrichment factors (EF<sub>20</sub>) compared to random selection. <sup>d</sup> PI is semi-quantitative measurement of the correlation of predicted binding affinity with experimental values.

**Supplementary Table 4.** Visualization of fingerprint bits.

|    | bit          | zinc_freq           | log2_FC            | mean_freq           | active_freq           | decoy_freq           | example_1 | example_2 | example_3 | example_4 |
|----|--------------|---------------------|--------------------|---------------------|-----------------------|----------------------|-----------|-----------|-----------|-----------|
| 1  | bit:<br>1452 | zinc_freq:<br>22.7% | log2(FC):<br>1.14  | mean_freq:<br>27.5% | active_freq:<br>37.9% | decoy_freq:<br>17.2% |           |           |           |           |
| 2  | bit:<br>283  | zinc_freq:<br>19.2% | log2(FC):<br>-1.03 | mean_freq:<br>15.3% | active_freq:<br>10.0% | decoy_freq:<br>20.6% |           |           |           |           |
| 3  | bit:<br>41   | zinc_freq:<br>16.7% | log2(FC):<br>-1.20 | mean_freq:<br>10.6% | active_freq:<br>6.4%  | decoy_freq:<br>14.8% |           |           |           |           |
| 4  | bit:<br>1866 | zinc_freq:<br>10.8% | log2(FC):<br>1.67  | mean_freq:<br>11.9% | active_freq:<br>18.1% | decoy_freq:<br>5.7%  |           |           |           |           |
| 5  | bit:<br>1160 | zinc_freq:<br>10.4% | log2(FC):<br>1.45  | mean_freq:<br>16.7% | active_freq:<br>24.5% | decoy_freq:<br>8.9%  |           |           |           |           |
| 6  | bit:<br>116  | zinc_freq:<br>10.2% | log2(FC):<br>-1.36 | mean_freq:<br>9.8%  | active_freq:<br>5.5%  | decoy_freq:<br>14.2% |           |           |           |           |
| 7  | bit:<br>1823 | zinc_freq:<br>10.1% | log2(FC):<br>-2.12 | mean_freq:<br>7.1%  | active_freq:<br>2.6%  | decoy_freq:<br>11.5% |           |           |           |           |
| 8  | bit:<br>1535 | zinc_freq:<br>9.9%  | log2(FC):<br>1.51  | mean_freq:<br>12.0% | active_freq:<br>17.8% | decoy_freq:<br>6.3%  |           |           |           |           |
| 9  | bit:<br>1066 | zinc_freq:<br>9.9%  | log2(FC):<br>1.20  | mean_freq:<br>10.6% | active_freq:<br>14.8% | decoy_freq:<br>6.4%  |           |           |           |           |
| 10 | bit:<br>1238 | zinc_freq:<br>9.4%  | log2(FC):<br>-1.38 | mean_freq:<br>6.3%  | active_freq:<br>3.5%  | decoy_freq:<br>9.2%  |           |           |           |           |
| 11 | bit:<br>1357 | zinc_freq:<br>8.7%  | log2(FC):<br>1.13  | mean_freq:<br>15.2% | active_freq:<br>20.9% | decoy_freq:<br>9.6%  |           |           |           |           |

|    | bit       | zinc_freq       | log2_FC         | mean_freq        | active_freq        | decoy_freq        | 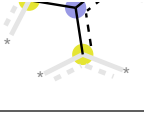    |     |     |     |
|----|-----------|-----------------|-----------------|------------------|--------------------|-------------------|-------------------------------------------------------------------------------------|--------------------------------------------------------------------------------------|---------------------------------------------------------------------------------------|---------------------------------------------------------------------------------------|
| 12 | bit: 235  | zinc_freq: 7.8% | log2(FC): -2.13 | mean_freq: 5.9%  | active_freq: 2.2%  | decoy_freq: 9.6%  |    |    |    |    |
| 13 | bit: 1164 | zinc_freq: 7.7% | log2(FC): -1.52 | mean_freq: 5.8%  | active_freq: 3.0%  | decoy_freq: 8.6%  |    |    |    |    |
| 14 | bit: 145  | zinc_freq: 6.9% | log2(FC): -1.67 | mean_freq: 5.0%  | active_freq: 2.4%  | decoy_freq: 7.6%  |    |    |    |    |
| 15 | bit: 147  | zinc_freq: 6.5% | log2(FC): -1.13 | mean_freq: 4.7%  | active_freq: 3.0%  | decoy_freq: 6.5%  |    |    |    |    |
| 16 | bit: 1309 | zinc_freq: 6.4% | log2(FC): -1.59 | mean_freq: 6.7%  | active_freq: 3.4%  | decoy_freq: 10.1% |  |  |  |  |
| 17 | bit: 341  | zinc_freq: 6.2% | log2(FC): -2.43 | mean_freq: 5.1%  | active_freq: 1.6%  | decoy_freq: 8.7%  |  |  |  |  |
| 18 | bit: 896  | zinc_freq: 6.1% | log2(FC): 1.47  | mean_freq: 10.7% | active_freq: 15.8% | decoy_freq: 5.7%  |  |  |  |  |
| 19 | bit: 753  | zinc_freq: 5.7% | log2(FC): -1.34 | mean_freq: 4.5%  | active_freq: 2.6%  | decoy_freq: 6.5%  |  |  |  |  |
| 20 | bit: 747  | zinc_freq: 5.7% | log2(FC): -1.53 | mean_freq: 4.6%  | active_freq: 2.4%  | decoy_freq: 6.9%  |  |  |  |  |
| 21 | bit: 352  | zinc_freq: 5.7% | log2(FC): 1.57  | mean_freq: 12.0% | active_freq: 17.9% | decoy_freq: 6.0%  |  |  |  |  |
| 22 | bit: 728  | zinc_freq: 5.6% | log2(FC): -1.77 | mean_freq: 7.1%  | active_freq: 3.2%  | decoy_freq: 11.0% |  |  |  |  |

|    | bit          | zinc_freq          | log2(FC)           | mean_freq          | active_freq           | decoy_freq           |  |  |  |  |
|----|--------------|--------------------|--------------------|--------------------|-----------------------|----------------------|--|--|--|--|
|    |              |                    |                    |                    |                       |                      |  |  |  |  |
| 23 | bit:<br>102  | zinc_freq:<br>5.6% | log2(FC):<br>1.37  | mean_freq:<br>7.0% | active_freq:<br>10.1% | decoy_freq:<br>3.9%  |  |  |  |  |
| 24 | bit:<br>725  | zinc_freq:<br>5.6% | log2(FC):<br>-1.29 | mean_freq:<br>5.8% | active_freq:<br>3.4%  | decoy_freq:<br>8.2%  |  |  |  |  |
| 25 | bit:<br>1279 | zinc_freq:<br>5.5% | log2(FC):<br>-1.04 | mean_freq:<br>7.4% | active_freq:<br>4.9%  | decoy_freq:<br>10.0% |  |  |  |  |
| 26 | bit:<br>1195 | zinc_freq:<br>5.4% | log2(FC):<br>-1.55 | mean_freq:<br>4.1% | active_freq:<br>2.1%  | decoy_freq:<br>6.2%  |  |  |  |  |
| 27 | bit:<br>736  | zinc_freq:<br>5.3% | log2(FC):<br>1.39  | mean_freq:<br>8.2% | active_freq:<br>11.9% | decoy_freq:<br>4.5%  |  |  |  |  |
| 28 | bit:<br>237  | zinc_freq:<br>5.3% | log2(FC):<br>-1.62 | mean_freq:<br>4.7% | active_freq:<br>2.3%  | decoy_freq:<br>7.1%  |  |  |  |  |
| 29 | bit:<br>1963 | zinc_freq:<br>5.2% | log2(FC):<br>-1.50 | mean_freq:<br>4.1% | active_freq:<br>2.1%  | decoy_freq:<br>6.1%  |  |  |  |  |
| 30 | bit:<br>1013 | zinc_freq:<br>5.2% | log2(FC):<br>-1.95 | mean_freq:<br>3.6% | active_freq:<br>1.5%  | decoy_freq:<br>5.7%  |  |  |  |  |
| 31 | bit:<br>1920 | zinc_freq:<br>5.0% | log2(FC):<br>-1.15 | mean_freq:<br>3.7% | active_freq:<br>2.3%  | decoy_freq:<br>5.2%  |  |  |  |  |
| 32 | bit:<br>1603 | zinc_freq:<br>4.6% | log2(FC):<br>1.94  | mean_freq:<br>5.9% | active_freq:<br>9.4%  | decoy_freq:<br>2.4%  |  |  |  |  |

|    | bit          | zinc_freq          | log2_FC            | mean_freq          | active_freq          | decoy_freq          |                                                                                     |                                                                                      |                                                                                       |                                                                                       |
|----|--------------|--------------------|--------------------|--------------------|----------------------|---------------------|-------------------------------------------------------------------------------------|--------------------------------------------------------------------------------------|---------------------------------------------------------------------------------------|---------------------------------------------------------------------------------------|
| 33 | bit:<br>257  | zinc_freq:<br>4.6% | log2(FC):<br>-1.09 | mean_freq:<br>4.9% | active_freq:<br>3.1% | decoy_freq:<br>6.7% | 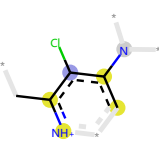   |    |    |    |
| 34 | bit:<br>1959 | zinc_freq:<br>4.5% | log2(FC):<br>-1.85 | mean_freq:<br>3.8% | active_freq:<br>1.7% | decoy_freq:<br>6.0% |    |    |    |    |
| 35 | bit:<br>1853 | zinc_freq:<br>4.4% | log2(FC):<br>-1.47 | mean_freq:<br>5.2% | active_freq:<br>2.8% | decoy_freq:<br>7.6% |    |    |    |    |
| 36 | bit:<br>980  | zinc_freq:<br>4.4% | log2(FC):<br>1.20  | mean_freq:<br>5.0% | active_freq:<br>7.0% | decoy_freq:<br>3.0% |    |    |    |    |
| 37 | bit:<br>1791 | zinc_freq:<br>4.4% | log2(FC):<br>1.05  | mean_freq:<br>3.8% | active_freq:<br>5.1% | decoy_freq:<br>2.5% |   |   |   |   |
| 38 | bit:<br>281  | zinc_freq:<br>4.3% | log2(FC):<br>-1.18 | mean_freq:<br>3.9% | active_freq:<br>2.4% | decoy_freq:<br>5.5% |  |  |  |  |
| 39 | bit:<br>1405 | zinc_freq:<br>4.1% | log2(FC):<br>1.02  | mean_freq:<br>4.0% | active_freq:<br>5.4% | decoy_freq:<br>2.7% |  |  |  |  |
| 40 | bit:<br>45   | zinc_freq:<br>4.1% | log2(FC):<br>1.35  | mean_freq:<br>4.9% | active_freq:<br>7.1% | decoy_freq:<br>2.8% |  |  |  |  |
| 41 | bit:<br>2031 | zinc_freq:<br>4.1% | log2(FC):<br>-1.35 | mean_freq:<br>4.9% | active_freq:<br>2.7% | decoy_freq:<br>7.0% |  |  |  |  |
| 42 | bit:<br>523  | zinc_freq:<br>4.0% | log2(FC):<br>1.02  | mean_freq:<br>3.9% | active_freq:<br>5.2% | decoy_freq:<br>2.6% |  |  |  |  |
| 43 | bit:<br>193  | zinc_freq:<br>3.9% | log2(FC):<br>1.35  | mean_freq:<br>4.3% | active_freq:<br>6.2% | decoy_freq:<br>2.4% |  |  |  |  |

|    | bit          | zinc_freq          | log2_FC            | mean_freq          | active_freq          | decoy_freq          |           |  |           |  |
|----|--------------|--------------------|--------------------|--------------------|----------------------|---------------------|-----------|--|-----------|--|
|    |              |                    |                    |                    |                      |                     |           |  |           |  |
| 44 | bit:<br>879  | zinc_freq:<br>3.9% | log2(FC):<br>-1.12 | mean_freq:<br>4.6% | active_freq:<br>2.9% | decoy_freq:<br>6.2% |           |  |           |  |
| 45 | bit:<br>241  | zinc_freq:<br>3.7% | log2(FC):<br>-1.06 | mean_freq:<br>3.3% | active_freq:<br>2.1% | decoy_freq:<br>4.5% |           |  |           |  |
| 46 | bit:<br>29   | zinc_freq:<br>3.7% | log2(FC):<br>1.03  | mean_freq:<br>3.9% | active_freq:<br>5.3% | decoy_freq:<br>2.6% | $H^+$<br> |  |           |  |
| 47 | bit:<br>502  | zinc_freq:<br>3.7% | log2(FC):<br>-1.01 | mean_freq:<br>3.6% | active_freq:<br>2.4% | decoy_freq:<br>4.8% |           |  |           |  |
| 48 | bit:<br>1043 | zinc_freq:<br>3.6% | log2(FC):<br>1.31  | mean_freq:<br>3.2% | active_freq:<br>4.6% | decoy_freq:<br>1.9% |           |  | $H^+$<br> |  |
| 49 | bit:<br>448  | zinc_freq:<br>3.6% | log2(FC):<br>1.30  | mean_freq:<br>3.3% | active_freq:<br>4.7% | decoy_freq:<br>1.9% |           |  |           |  |
| 50 | bit:<br>1034 | zinc_freq:<br>3.3% | log2(FC):<br>1.37  | mean_freq:<br>5.5% | active_freq:<br>7.9% | decoy_freq:<br>3.1% |           |  |           |  |
| 51 | bit:<br>909  | zinc_freq:<br>3.3% | log2(FC):<br>-2.05 | mean_freq:<br>4.1% | active_freq:<br>1.6% | decoy_freq:<br>6.6% |           |  |           |  |
| 52 | bit:<br>97   | zinc_freq:<br>3.2% | log2(FC):<br>-1.58 | mean_freq:<br>3.4% | active_freq:<br>1.7% | decoy_freq:<br>5.1% |           |  |           |  |
| 53 | bit:<br>984  | zinc_freq:<br>3.2% | log2(FC):<br>1.05  | mean_freq:<br>4.7% | active_freq:<br>6.4% | decoy_freq:<br>3.1% |           |  |           |  |
| 54 |              |                    |                    |                    |                      |                     |           |  |           |  |



|    | bit          | zinc_freq          | log2_FC            | mean_freq          | active_freq          | decoy_freq          |                                                                                     |                                                                                      |                                                                                       |                                                                                       |
|----|--------------|--------------------|--------------------|--------------------|----------------------|---------------------|-------------------------------------------------------------------------------------|--------------------------------------------------------------------------------------|---------------------------------------------------------------------------------------|---------------------------------------------------------------------------------------|
|    | bit:<br>1441 | zinc_freq:<br>3.1% | log2(FC):<br>1.03  | mean_freq:<br>3.3% | active_freq:<br>4.5% | decoy_freq:<br>2.2% | 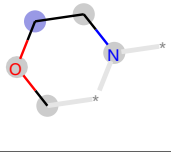   |    |    |    |
| 55 | bit:<br>1157 | zinc_freq:<br>3.0% | log2(FC):<br>-1.01 | mean_freq:<br>3.8% | active_freq:<br>2.5% | decoy_freq:<br>5.0% |    |    |    |    |
| 56 | bit:<br>785  | zinc_freq:<br>3.0% | log2(FC):<br>1.10  | mean_freq:<br>6.0% | active_freq:<br>8.2% | decoy_freq:<br>3.8% |    |    |    |    |
| 57 | bit:<br>806  | zinc_freq:<br>2.8% | log2(FC):<br>1.05  | mean_freq:<br>5.0% | active_freq:<br>6.8% | decoy_freq:<br>3.3% |    |    |    |    |
| 58 | bit:<br>1427 | zinc_freq:<br>2.8% | log2(FC):<br>-1.91 | mean_freq:<br>3.6% | active_freq:<br>1.5% | decoy_freq:<br>5.6% |   |   |   |   |
| 59 | bit:<br>1416 | zinc_freq:<br>2.8% | log2(FC):<br>1.05  | mean_freq:<br>4.3% | active_freq:<br>5.9% | decoy_freq:<br>2.8% |  |  |  |  |
| 60 | bit:<br>680  | zinc_freq:<br>2.8% | log2(FC):<br>1.45  | mean_freq:<br>4.7% | active_freq:<br>6.8% | decoy_freq:<br>2.5% |  |  |  |  |
| 61 | bit:<br>42   | zinc_freq:<br>2.8% | log2(FC):<br>-2.37 | mean_freq:<br>3.2% | active_freq:<br>1.0% | decoy_freq:<br>5.3% |  |  |  |  |
| 62 | bit:<br>1501 | zinc_freq:<br>2.6% | log2(FC):<br>1.02  | mean_freq:<br>3.3% | active_freq:<br>4.5% | decoy_freq:<br>2.2% |  |  |  |  |
| 63 | bit:<br>1586 | zinc_freq:<br>2.6% | log2(FC):<br>2.19  | mean_freq:<br>3.6% | active_freq:<br>6.0% | decoy_freq:<br>1.3% |  |  |  |  |
| 64 | bit:<br>1507 | zinc_freq:<br>2.4% | log2(FC):<br>-1.58 | mean_freq:<br>3.2% | active_freq:<br>1.6% | decoy_freq:<br>4.9% |  |  |  |  |

|    | bit  | zinc_freq       | log2_FC         | mean_freq       | active_freq       | decoy_freq       |  |  |  |  |
|----|------|-----------------|-----------------|-----------------|-------------------|------------------|--|--|--|--|
| 65 | 1045 | zinc_freq: 2.4% | log2(FC): 1.52  | mean_freq: 3.4% | active_freq: 5.1% | decoy_freq: 1.8% |  |  |  |  |
| 66 | 927  | zinc_freq: 2.3% | log2(FC): -1.18 | mean_freq: 3.0% | active_freq: 1.9% | decoy_freq: 4.2% |  |  |  |  |
| 67 | 489  | zinc_freq: 2.3% | log2(FC): 1.41  | mean_freq: 4.3% | active_freq: 6.3% | decoy_freq: 2.4% |  |  |  |  |
| 68 | 79   | zinc_freq: 2.2% | log2(FC): 1.15  | mean_freq: 3.9% | active_freq: 5.4% | decoy_freq: 2.4% |  |  |  |  |
| 69 | 323  | zinc_freq: 2.1% | log2(FC): 1.44  | mean_freq: 4.6% | active_freq: 6.7% | decoy_freq: 2.5% |  |  |  |  |
| 70 | 878  | zinc_freq: 1.9% | log2(FC): 1.46  | mean_freq: 4.3% | active_freq: 6.4% | decoy_freq: 2.3% |  |  |  |  |
| 71 | 708  | zinc_freq: 1.9% | log2(FC): 1.59  | mean_freq: 4.2% | active_freq: 6.3% | decoy_freq: 2.1% |  |  |  |  |
| 72 | 271  | zinc_freq: 1.9% | log2(FC): -1.28 | mean_freq: 3.7% | active_freq: 2.2% | decoy_freq: 5.3% |  |  |  |  |
| 73 | 491  | zinc_freq: 1.8% | log2(FC): 2.27  | mean_freq: 5.7% | active_freq: 9.4% | decoy_freq: 1.9% |  |  |  |  |
| 74 | 381  | zinc_freq: 1.7% | log2(FC): 1.47  | mean_freq: 4.6% | active_freq: 6.7% | decoy_freq: 2.4% |  |  |  |  |
| 75 | 203  | zinc_freq: 1.7% | log2(FC): 1.08  | mean_freq: 3.0% | active_freq: 4.1% | decoy_freq: 2.0% |  |  |  |  |

|    | bit          | zinc_freq          | log2_FC           | mean_freq          | active_freq          | decoy_freq          |  |  |  |  |
|----|--------------|--------------------|-------------------|--------------------|----------------------|---------------------|--|--|--|--|
|    |              |                    |                   |                    |                      |                     |  |  |  |  |
| 76 | bit:<br>2010 | zinc_freq:<br>1.7% | log2(FC):<br>1.57 | mean_freq:<br>3.4% | active_freq:<br>5.1% | decoy_freq:<br>1.7% |  |  |  |  |
| 77 | bit:<br>832  | zinc_freq:<br>1.6% | log2(FC):<br>1.43 | mean_freq:<br>3.1% | active_freq:<br>4.5% | decoy_freq:<br>1.7% |  |  |  |  |
| 78 | bit:<br>1747 | zinc_freq:<br>1.5% | log2(FC):<br>1.30 | mean_freq:<br>4.5% | active_freq:<br>6.5% | decoy_freq:<br>2.6% |  |  |  |  |
| 79 | bit:<br>1733 | zinc_freq:<br>1.5% | log2(FC):<br>1.12 | mean_freq:<br>3.0% | active_freq:<br>4.1% | decoy_freq:<br>1.9% |  |  |  |  |
| 80 | bit:<br>1313 | zinc_freq:<br>1.4% | log2(FC):<br>1.51 | mean_freq:<br>4.0% | active_freq:<br>5.9% | decoy_freq:<br>2.1% |  |  |  |  |
| 81 | bit:<br>1617 | zinc_freq:<br>1.4% | log2(FC):<br>1.84 | mean_freq:<br>3.5% | active_freq:<br>5.5% | decoy_freq:<br>1.5% |  |  |  |  |
| 82 | bit:<br>457  | zinc_freq:<br>1.0% | log2(FC):<br>1.74 | mean_freq:<br>6.2% | active_freq:<br>9.5% | decoy_freq:<br>2.9% |  |  |  |  |
| 83 | bit:<br>1459 | zinc_freq:<br>0.9% | log2(FC):<br>1.32 | mean_freq:<br>3.4% | active_freq:<br>4.8% | decoy_freq:<br>1.9% |  |  |  |  |
| 84 | bit:<br>1868 | zinc_freq:<br>0.8% | log2(FC):<br>1.94 | mean_freq:<br>3.5% | active_freq:<br>5.6% | decoy_freq:<br>1.5% |  |  |  |  |
